# Supplementary material for: Lipidomics Revealed Alteration of the Sphingolipid Metabolism in the Liver of Nonalcoholic Steatohepatitis Mice Treated with Scoparone
Source: PubMed Central journal article supplement — ACS Omega. 2022 Apr 14;7(16):14121–7. doi: 10.1021/acsomega.2c00693 (PMC9089391; doi:10.1021/acsomega.2c00693), 2022-04-14
Supplement: ao2c00693_si_001.pdf [file ao2c00693_si_001.pdf]

# Lipidomics Revealed Alteration of Sphingolipid Metabolism in Liver of NASH Mice Treated with Scoparone<sup>†</sup>

E-mail:

## Supporting Information Available

Figure S1: PCA score plot of QC samples.

Figure S2: Levels of sphingolipids linked to HFD-fed NASH-like mice.

Figure S3: Levels of sphingolipids after scoparone treatment.

---

<sup>†</sup>A footnote for the title

### PCA Control & NASH & Scoparone

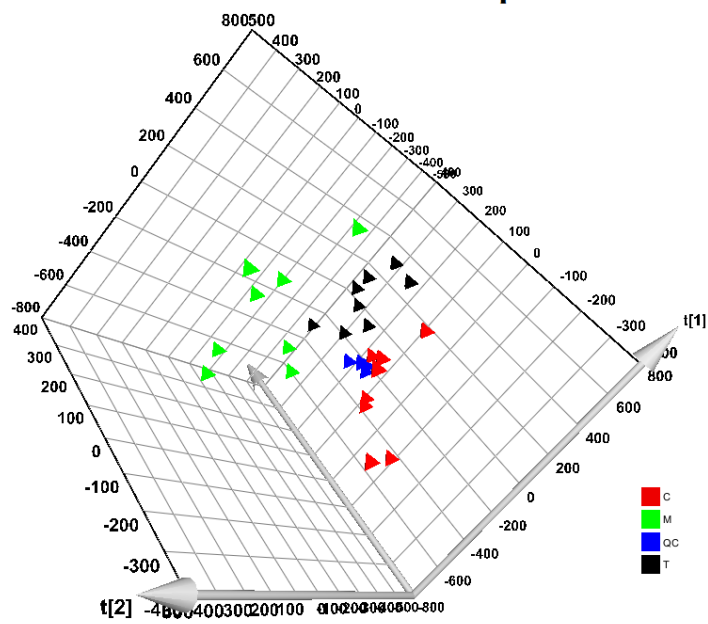

Figure S1: PCA score plot of QC samples.

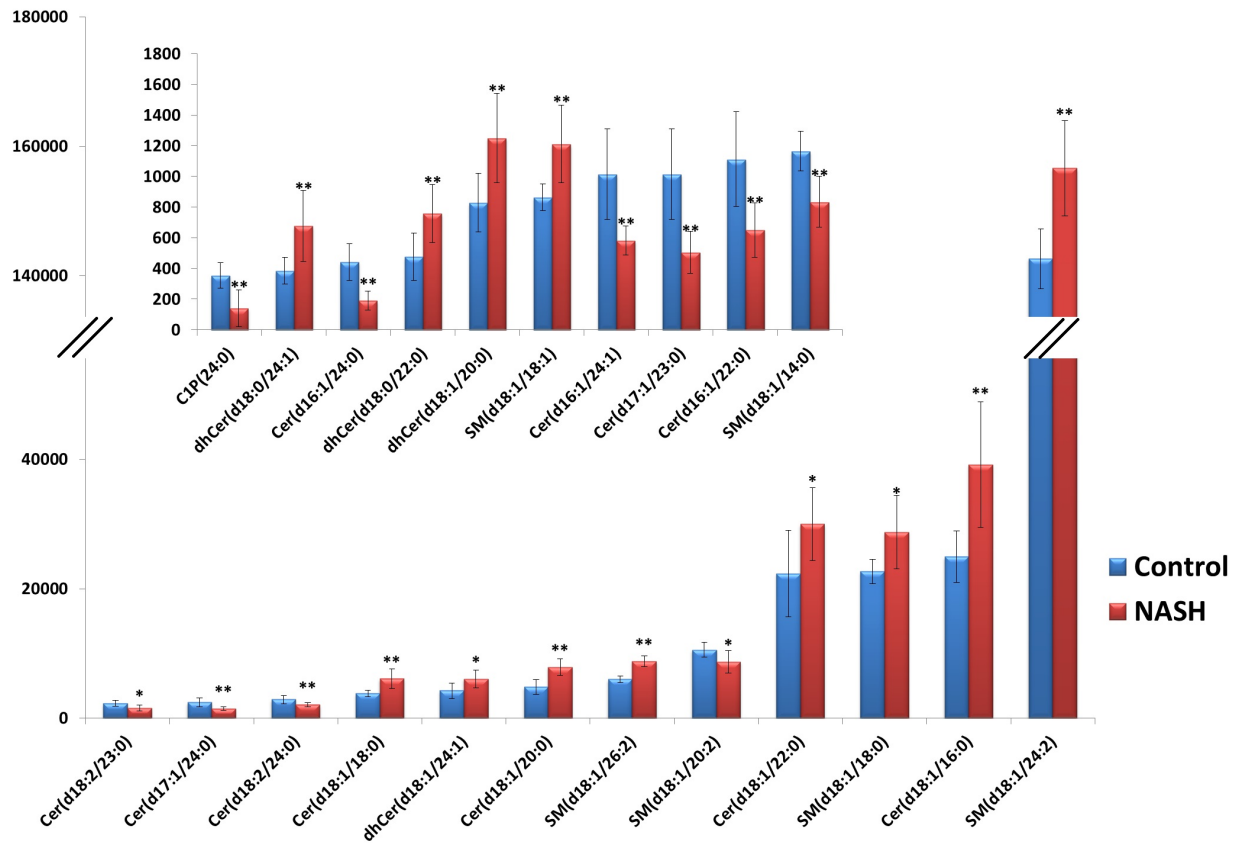

Figure S2: Levels of sphingolipids linked to HFD-fed NASH-like mice. \*P < 0.05 and \*\*P < 0.01 compared with the control group.

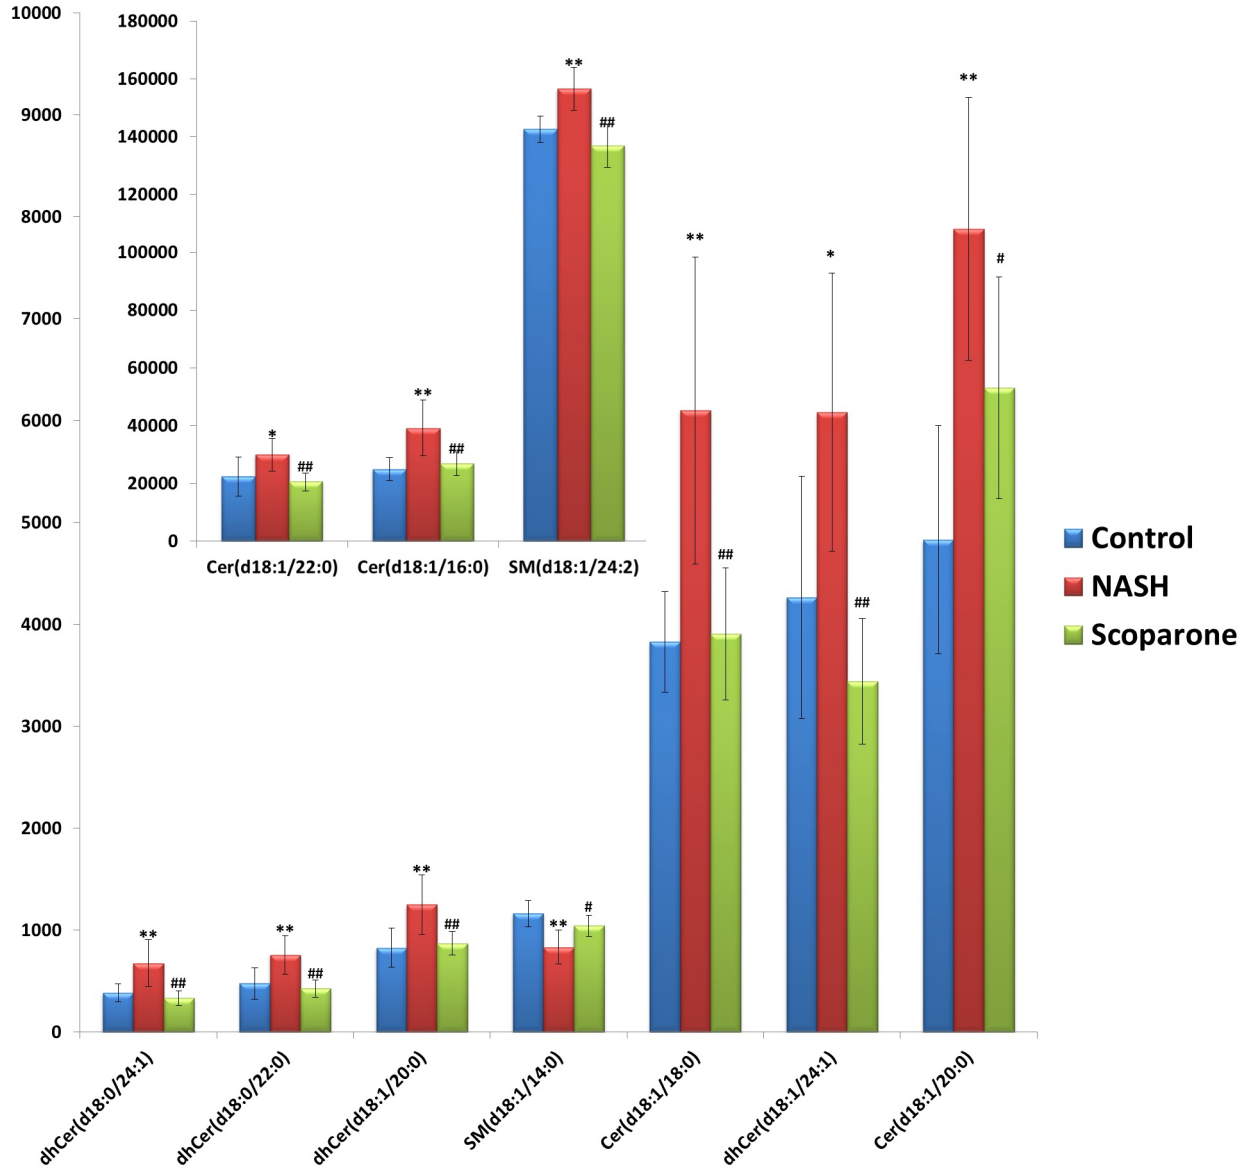

Figure S3: Levels of sphingolipids after scoparone treatment. \*P < 0.05 and \*\*P < 0.01 compared with the control group; #P < 0.05 and ## P < 0.01 compared with the NASH group.

## TOC Graphic

Some journals require a graphical entry for the Table of Contents. This should be laid out “print ready” so that the sizing of the text is correct.

Inside the tocentry environment, the font used is Helvetica 8 pt, as required by *Journal of the American Chemical Society*.

The surrounding frame is 9 cm by 3.5 cm, which is the maximum permitted for *Journal of the American Chemical Society* graphical table of content entries. The box will not resize if the content is too big: instead it will overflow the edge of the box.

This box and the associated title will always be printed on a separate page at the end of the document.
